# Supplementary material
Source: publisher site journal article supplement (https://natureconservation.pensoft.net/article/63688/download/suppl/31/)
Supplement: Supplementary file 1

## Supplementary Information

**Table S1:** Trade data reported in LEMIS for the Malabar civet (*Viverra civettina*) from 2000 – 2019. CM = Cameroon, GH = Ghana, TZ = Tanzania, US = United States of America, ZA = South Africa, ZW = Zimbabwe.

| Year | Importer | Exporter | Origin | Quantity | Commodity | Purpose    | Source  | Action  |
|------|----------|----------|--------|----------|-----------|------------|---------|---------|
| 2001 | US       | TZ       | TZ     | 1        | Trophy    | Hunting    | Wild    | Cleared |
| 2001 | US       | ZW       | ZW     | 1        | Trophy    | Personal   | Wild    | Cleared |
| 2001 | US       | ZW       | ZW     | 1        | Trophy    | Commercial | Wild    | Cleared |
| 2001 | US       | ZW       | ZW     | 2        | Trophy    | Hunting    | Wild    | Cleared |
| 2001 | US       | ZW       | ZA     | 1        | Trophy    | Commercial | Wild    | Cleared |
| 2001 | US       | ZW       | ZW     | 1        | Trophy    | Hunting    | Wild    | Cleared |
| 2001 | US       | ZW       | ZW     | 4        | Trophy    | Hunting    | Wild    | Cleared |
| 2001 | US       | ZW       | ZW     | 1        | Trophy    | Hunting    | Wild    | Cleared |
| 2002 | US       | ZA       | ZW     | 1        | Trophy    | Hunting    | Wild    | Cleared |
| 2002 | US       | ZW       | ZW     | 1        | Trophy    | Hunting    | Wild    | Cleared |
| 2002 | US       | ZW       | ZW     | 1        | Trophy    | Hunting    | Wild    | Cleared |
| 2002 | US       | ZW       | ZW     | 1        | Trophy    | Hunting    | Wild    | Cleared |
| 2002 | US       | GH       | GH     | 8        | Live      | Commercial | Ranched | Cleared |
| 2002 | US       | CM       | CM     | 1        | Trophy    | Hunting    | Wild    | Cleared |
| 2002 | US       | CM       | CM     | 1        | Trophy    | Hunting    | Wild    | Cleared |
| 2002 | US       | CM       | CM     | 1        | Trophy    | Hunting    | Wild    | Cleared |
| 2002 | US       | GH       | GH     | 8        | Live      | Commercial | Wild    | Cleared |
